# Supplementary material for: Modular structure, sequence diversification and appropriate nomenclature of seroins produced in the silk glands of Lepidoptera
Source: PubMed Central journal article supplement (PMC6405961; doi:10.1038/s41598-019-40401-3), 2019-03-07

## Supplementary Information

### Modular structure, sequence diversification and appropriate nomenclature of seroins produced in the silk glands of Lepidoptera

Lucie Kucerova<sup>1</sup>, Michal Zurovec\*<sup>1,2</sup>, Barbara Kludkiewicz<sup>1</sup>, Miluse Hradilova<sup>3</sup>, Hynek Strnad<sup>3</sup>, and Frantisek Sehnal\*<sup>1,2</sup>

#### Affiliations:

<sup>1</sup>Institute of Entomology, Biology Centre CAS, Branisovska 31, 370 05 Ceske Budejovice, Czech Republic;

<sup>2</sup>Faculty of Science, University of South Bohemia, Branisovska 31, 370 05 Ceske Budejovice, Czech Republic;

<sup>3</sup>Institute of Molecular Genetics CAS, Videnska 1083, 142 20 Prague 4; Czech Republic;

\*Correspondence to [zurovec@entu.cas.cz](mailto:zurovec@entu.cas.cz) and [sehnal@bc.cas.cz](mailto:sehnal@bc.cas.cz)

## Contents:

|                                                                                     |    |
|-------------------------------------------------------------------------------------|----|
| Table S1. The deduced amino acid sequences of seroins and their accession numbers   | 3  |
| Supplementary figure legends                                                        | 13 |
| Figure S1. Alignments of amino acid sequences of the Sn1 seroins                    | 15 |
| Figure S2. Alignments of amino acid sequences of the Sn2 seroins                    | 16 |
| Figure S3. Alignment of amino acid sequences of the Sn3 seroins                     | 17 |
| Figure S4. Alignment of 117 seroin protein sequences used for phylogenetic analysis | 14 |
| Figure S5. Phylogenetic trees based on 117 seroin protein sequences                 | 18 |

**Table S1. Seroin sequences in species listed in alphabetic order.** The first two or three letters and the signs Sn1, Sn2 and Sn3 in the seroin names denote the insect species and the seroin class. In case of gene duplication within class, gene number follows after a hyphen. The splicing versions are distinguished by capital letters inserted after the gene specification. The additional number at the end of the name indicate minor sequence differences (point mutations or short deletions). For detail explanation see section 3.2. \* - data on *B. huttoni* were provided by Dr. Arun Kumar K. P., Centre for DNA Fingerprinting & Diagnostics, Hyderabad, India (Singh et al. 2014).

MG604956, **AeSn1A** (*Acanthobrahmea europaea*)  
MAFKIIFISITLAVVVNGIKWPGFDDKFGFLNFPQIIPNFPSPPPPVLMKVTFFPSISVEKKGKTPGEIFSAVLIT  
AYADNKDGEHGKGGGSWLVNDDGHIESGFFGNLQPNPDLGQSEETETEII

MG604957, **AeSn1B** (*Acanthobrahmea europaea*)  
MAFKIIFISITLAVVVNGIKWPGFDDKFGFLNFPQDFKPHKMPKFDIPTMDPSFFKHLSPDEIRSHAPGPNEHYSA  
SSVSKHTYSSNKNKKESGGEMNEIYNDNGAVTEKILQFNQKDED

MG649312, **AeSn2A** (*Acanthobrahmea europaea*)  
MRSIIFISAVCLQLFWCNGLPNARGVGAYSYSDSAGNRYGGTYGLNDGQVVDVKGDFPPNFHPQNFQDLDDFFPS  
YFANLDNLVQETFHRNVEIQRLAFNAARKAFDLTSNQAGYNPYFDSRFPPYNGFGQYGGFPEFPFHRFGIPNNMN  
ENSAYAGAFARPGYSRQIAAINPNNPNMPNVDQENRYSESKSGKNPGSNYMSVSSSSYSTSSDTNGQLKSSRGAE  
TIVDDNGRITRYKVQS

MG649313, **AeSn2B** (*Acanthobrahmea europaea*)  
MRSIIFISAVCLQLFWCNGLPNARGVGAYSYSDSAGNRYGGTYGLNDGQVVDVKGDFPPNFHPQNFQDLDDFFPS  
YFANLDNLVQEFPPYNGFGQYGGFPEFPFHRFGIPNNMNENSAYAGAFARPGYSRQIAAINPNNPNMPNVDQENR  
YSESKSGKNPGSNYMSVSSSSYSTSSDTNGQLKSSRGAEITIVDDNGRITRYKVQS

MG649314, **AeSn2C** (*Acanthobrahmea europaea*)  
MRSIIFISAVCLQLFWCNGLPNARGVGAYSYSDSAGNRFPYNGFGQYGGFPEFPFHRFGIPNNMNENSAYAGAF  
ARPGYSRQIAAINPNNPNMPNVDQENRYSESKSGKNPGSNYMSVSSSSYSTSSDTNGQLKSSRGAEITIVDDNGRI  
TRYKVQS

MG649315, **AeSn3** (*Acanthobrahmea europaea*)  
MYKIVTVLVLAVATAQGRPSLPVMDEIISAVAAGNWDQIRKLIASGLEQDATWKSLSGTVKDLKAPEGGHVYG  
EAEYTFHSATNFGQTNEQSG

GBCW01005735 (translated to AA), **AsSn3** (*Agrotis segetum*)  
MAKFAPIFLLVGVFIRVQALPLTQEEILEAARKSQFEQLQQLLRDNFAKNADFKNQPVIFDGVRLKPVGGGHVY  
GEAEYSFHSASNIDGKTKEDHAGHKVINNDGKVKFEFDFTPKAGLLPALPGFKPPSQFGNDYSASDSSAKYASSTA  
DKPGDFVKQPVLPSPNIPFPPLSFTDIKDLKPTQGGKVFGEAEFYHTATNVDGKVSSEDRGGHKVINNNGQVQEF  
LTPVPQKSLVGSYSRN

XP\_013188735, **AtSn1A** (*Amyelois transitella*)  
MASTILLIVSFIAATNADYVWVDEESDAPQGYKRMYPPLPQPPPLPGFGQLPPLPQPPPLYVVDLNQGFQHFQF  
NFVPIINIPSPADIKNTKPAQGVFNGVSIKSVSGVSVDKDGNIVKTGGTTFVVDNNGEVKETKVGKNPPNIEDPF  
VLAISSEKPHFQMPKIPDPVTFEPITFKPIVFKPFKPIITFKPIITFEPITFDPIITFKPIDMNYKPADGENYVAVSH  
SSHVETSNIDGVVSNSSGSSDMVNVNGNTDKELVEFKNDPKHQTEEAHRNEE

XP\_013188737, **AtSn1B** (*Amyelois transitella*)  
MASIIILIIISLVAFFVAGYVWVDEEEAPAPPYKRMYPPLPQPPPLPGFGYLPPLPQPPPLYVVDVDFSQGFQHF  
PSPFASVNIIPSPADIKNIKPEPGQVFSVSLKSTRGFDKDKDGNIVKTGGTTFVVDNNGEVKETKVGKNPPNIED  
PIVYPSIPEPVKIKRKPVFKPHVFKPFEPITFKPIDMNYKPADGENYVAVSHSTHSESSNINGVSNSSGSSNDM  
VNLNGETDREAVEFVNQDDPQNTSAEKNDN

XP\_013188736, **AtSn1C** (*Amyelois transitella*)  
MHTANSFHWTSHYGHIGHNSADYVWVDEESDAPQGYKRMYPPLPQPPPLPGFGQLPPLPQPPPLYVVDLNQGFQ  
HFQPNFVPIINIPSPADIKNTKPAQGVFNGVSIKSVSGVSVDKDGNIVKTGGTTFVVDNNGEVKETKVGKNPPNI  
EDPFVFPVTFPHFQMPKIPDPVTFEPITFKPIVFKPFKPIITFKPIITFEPITFDPIITFKPIDMNYKPADGENYVAVSH  
SSHVETSNIDGVVSNSSGSSDMVNVNGNTDKELVEFKNDPKHQTEEAHRNEE

XP\_013188734, **AtSn1D** (*Amyelois transitella*)  
MHTANSFHWTSHYGHIIHGNSADYVWVDEESDAPQGYKRMYPPLPQPPPLPGFGQLPPLPQPPPLYVPDLNQGFGQ  
HFQPNFVPIINIPSPADIKNTKPAPGQVFNGVSIKSVSGVSVDKDGNIVKTGGTTFVVDNNGEVKETKVGKNPPNI  
EDPFVLAISSEKPHFQMPKIPDPVTFEPITFKPIVFKPFKPIITFKPIITFEPITFDPIITFKPIDMNYKPADGENYV  
AVSHSSHVETSNIIDGVVSNSSGGSSDMVNVNGNTDKELVEFKNDPKHQTEEAHRNEE

XP\_013188731, **AtSn2** (*Amyelois transitella*)  
MNYFIVLGVICLQTKWIYIGIPVGVSSFSYQDSSGNRYGGTYQIPDGQFGHFFAPNDLFPQIPFEQNNYLPQGNF  
FPDYFRNFYELIQEAFRSNFANQNLALKAARKAFDLTSHQAGYIPYFPFRSGDFEDSQMFNSHNSAFAGAAAGPG  
YTHQIAAINPGPNPNQPNVNVLERFDDQPSIPGSNFVSMSSKSYAMSSNINGKETSNRGSETVVNNNGKITTEYSVH  
S

XP\_013333213, **AtSn3A** (*Amyelois transitella*)  
MSKIVILLLLLVTVACQGFPTDPNEDLATLAARGDWDVAHRLINTRFSRKDIWAPSPSTGNVKS LKPVVEGGEVYG  
EAEYTFHSSSNVNGQKTESSGGHKVINDNGRIQEFDFQPKY

XP\_013188666, **AtSn3B** (*Amyelois transitella*)  
MRSFSLVFLIAACIGSNKVNVAQDFDFGITIPKFTFTVPTLPKINIPPINPNTVKNMKPVNGESLNAVFSST  
SSQKNVDGTVQNTSNVKVINNSNGNVTEYSFKN

MG604949, **AkSn1A** (*Anagasta kuehniella*)  
MASAVLLIVVAVVAVVAVVAVVVEEEDDAPPGYKRFQQEFKPNPDPVKFKPFVFKPFKPIITFKPFEPITFKPIDIN  
YKPGEGETYVAQSHSTHSESSNVNGVEKNSGGSTAMLNINGDTEKEAVEFRDDPKNAKEEEDDE

MG604947, **AkSn1B** (*Anagasta kuehniella*)  
MASAVLLIVVAVVAVVAVVAVVVEEEDDAPPGYKRNPFEPASINIPSPGDIKNIKPEPGRVFNNGVSVKSVSNYEK  
EDGEPIRTGGTTFIVNENGEVKETKVGKNPPNIEDPIVFPSSSQEFKPNPDPVKFKPFVFKPFKPIITFKPFEPIT  
TFKPIDINYPGEGETYVAQSHSTHSESSNVNGVEKNSGGSTAMLNINGDTEKEAVEFRDDPKNAKEEEDDE

MG604948, **AkSn1B2** (*Anagasta kuehniella*)  
MASAVLLIVVAVVAVVAVVAVVVEEEDDAPPGYKRNPFEPASINIPSPGDIKNIKPEPGRVFNNGVSVKSVSNYEK  
EDGEPIRTGGTTFVNVNENGEVKETKVGKNPPNIEDPIVFPSSNPDPVKFKPFVFKPFKPIITFKPFEPITFKPIDI  
NYKPGEGETYVAQSHSTHSESSNVNGVEKNSGGSTAMLNINGDTEKEAVEFRDDPKNAKEEEDDE

MG604946, **AkSn1C** (*Anagasta kuehniella*)  
MASAVLLIVVAVVAVVAVVAVVVEEEDDAPPGYKRMYPPLPQPPPLPPGFGVLPPLSQPPPLYVRDFSKPLPEFQ  
HFQNFPEFASINIPSPGDIKNIKLEPGRVFNNGVSVKSVSNYEKDEDGEPIRTGGTTFVNVNENGEVKETKVGKNPP  
NIEDPIVFPSSSQEFKPNPDPVKFKPFVFKPFKPIITFKPFEPITFKPIDINYPGEGETYVAQSHSTHSESSNV  
NGVEKNSGGSTAMLNINGDTEKEAVEFRDDPKNAKEEEDDE

MG604950, **AkSn2** (*Anagasta kuehniella*), partial sequence  
HISGTPVGVSSFAYQDSSGNSITQTSDFSRSAESRFGPLPLRPLKFLKPLSRSSDFGNFGNMFNSPNSAFAGGFA  
SPGFTHQIAAISPPNPSNPVNVVFERFNEGSAIPGANFVSMKVQPTTSSSNVNGKEISNRGSENCRQINNGKVTG  
YSVHS

DQ666525, **AmSn1** (*Antheraea mylitta*)  
MALT KIFLALSVALSNAVLMWPNDDDRFPPLPRNNIRRYPSRGLPLFPDFQSVLSFPFNFGGGGFPGGAFAG  
GGAFAGGGGFAGDGGFTSGGVFSSIPFSPSDITNTKPAPGQTYTGI FAHSGGGEHYIMANLNHGHVVKYSDDGET  
ASET VINK

MG604951, **AySn1A** (*Antheraea yamamai*)  
MALT KIFLTLTSLVALSNAVLMWPNDDDRFPPLPQNNYRRYPSRGLPLFPDFQSVLSFPFNFGGGGFPGGAFAG  
GGAFAGGGGFAGDGGFTSGGVFSSIPSPSDITNTKPAPGQTYTGI FAHSGGGEHYIMANLNHGHVVKYSEDGET  
ASESVINK

MG604952, **AySn1B** (*Antheraea yamamai*)  
MALT KIFLTLTSLVALSNAVLMWPNDDDRFPPLPQMMNFDPDIKFTMPRIVPFHIPPPIIMDRDAIKTHVAGPNE  
HFTGFSTSSHSFTSNDNGKITSGGGISTLTNDGKNVEENVLEYGDKGNNDNNNNNNNNNN

MG604953, **AySn1C** (*Antheraea yamamai*)

MALTKIFLTLSLVALSNAVLMWPND DGRFPPLPQNNYRRYPSRGLPLFPDFQSVLSFPFNFVGGGGFPGGGAFAG  
GGAFAGGGGFAGDGGFTSGGVFSSIPSPSDITNTKPAPGQTYTGIFAHS GGGEHYIMANLN GHVVKYCMY

MH127913, **AySn2A** (*Antheraea yamamai*)

MGTHCF SVQYVAPTSPSGVPDQSGVGAFSYQDSAGNRYGGTYGLRDGQVVDTKGDFPPNFHFNTFQDLDSFFPEY  
FRNLGNLLQEA FNANFENQRLAFNAAQKAFDLTSNQAGYNPNFNYPGAGNFPNFGDFPGVPLAF PAMPNFGNEFG  
AFAAAVANPGYRQQIAAINP SNPGV PNVNEVRYSNSETPGNNGGYMAVSSTS YSTSSQNADGQITNSRAAETVIN  
DNGKITKYSVKN

MH127914, **AySn2B** (*Antheraea yamamai*)

MGTHCF SVQYVAPTSPSGVPDQSGVGAFSYQDSAGNRAF NANFENQRLAFNAAQKAFDLTSNQAGYNPNFNYPGA  
GNFPNFGDFPGVPLAF PAMPNFGNEFGAFAAAVANPGYRQQIAAINP SNPGV PNVNEVRYSNSETPGNNGGYMAV  
SSTS YSTSSQNADGQITNSRAAETVINDNGKITKYSVKN

MG604955, **AySn3** (*Antheraea yamamai*)

MSKLIIVVMAVAFYVTEANPAPNAFDPINNFAFPNPRHFP IAHSFESVRALRPEEGGQVSGMAISTSTRDDGAG  
GSVSQGRVLVKNKNGKLYETSFRKK

**BhSn1-1\*** (*Bombyx huttoni*)

MAFTKFLFVVTLITIASGASFWEDDDDMFPGVCIVFLQFKMPEMKPLEFDDIKSHVAGDNEHYTGESISSYSSS  
STVNGKKESSGGVSVLTNDGKAVKEKVM EYKDG

**BhSn1-2\*** (*Bombyx huttoni*)

MAFTKFLFMLS LITIASAGFVWQDDNFPGFSDMWP SIQIPTIPPFDPKIPNFAFSFPSPDN IKKTKPQPGQ TYS  
GVYVSSNGGKGT MVANINGEVIEKKFGEDSKKSKSKS

NP\_001037045, **BmSn1-1** (*Bombyx mori*)

MAFTKFLFVITLITIASAGFVWEDDDDLFP GFSDAFKMREIPEIKSLEFDDIKTHVAGDNEQYTGESKSSYSSSS  
TVNGKTVSSGGVSELTNDGKAVEEKVMEYKDG

NP\_001037046, **BmSn1-2** (*Bombyx mori*)

MAFTKFLFMLS LITIASAGFVWQDDNFPGFSDMWP SIQIPTIPPFDPKIPNFAFSFPSPDN IKKTKPQPGQ TYS  
GVYVSSNGGKGT MVANINGEVIEKKFGEDSKKSKSKS

XP\_004932380, **BmSn2A** (*Bombyx mori*)

MRNILMVCAICLVLA VGNALPNNRGVGAFA YQDSSGNRYGGTYGLKDGAVVDKQGD FPPNFQPE SFQDL DYFFPE  
YLRNFENLLREPFRFTPIRTKSFFPYTPLRFEPFRPFPSYPQRAFSSNIEAQRLAF EAAQKAFDLTSNQAGYIP  
GFDRFPIFNFPSPGFTDEQFPAMQNYPNQFGAFAGAAAGPGF SHQVASINPPNPNMPNVN KYTSSYGAQPNDGNQ  
FVSVSSSSYSSSVNDNGEVKNHRAAETVVNNNGKVTKYKVEN

XP\_004932382, **BmSn2B** (*Bombyx mori*)

MRNILMVCAICLVLA VGNALPNNRGVGAFA YQDSSGNRYGGTYGLKDGAVVDKQGD FPPNFQPE SFQDL DYFFPE  
YLRNFENLLREPFRFTPIRTKSFFPYTPLRFEPFRPFPSYPQRFPIFNFPSPGFTDEQFPAMQNYPNQFGAFAG  
AAAGPGF SHQVASINPPNPNMPNVN KYTSSYGAQPNDGNQFVSVSSSSYSSSVNDNGEVKNHRAAETVVNNNGKV  
TKYKVEN

XP\_004932383, **BmSn2C** (*Bombyx mori*)

MRNILMVCAICLVLA VGNALPNNRGVGAFA YQDSSGNRPFFRFTPIRTKSFFPYTPLRFEPFRPFPSYPQRAFSS  
NIEAQRLAF EAAQKAFDLTSNQAGYIPGFDRFPIFNFPSPGFTDEQFPAMQNYPNQFGAFAGAAAGPGF SHQVAS  
INPPNPNMPNVN KYTSSYGAQPNDGNQFVSVSSSSYSSSVNDNGEVKNHRAAETVVNNNGKVTKYKVEN

XP\_004932379, **BmSn3** (*Bombyx mori*)

MKLVLVTVLIVSVQAVPSFPIGDELFDAASSGDWEKVELIN SKLNENDSWKPV SAGSVKSLKPIPGGHVYGES  
EYTFHSSSDINGQKTDKSGGHKIINDDGKVYEFDFNPKVKGY

GADL01001805 (translated to AA), **CsSn1** (*Carposina sasakii*)

MTYNFFTC AAFVVVVVHAGAAWQANAWSGFQFPQMPNFILPTPPTPPTPPTLPTFPPTLPFAPFRPFAPFLPFAP  
VAPIAPVILPPLRPADIINMVP GPGQSFNGISVSSVSGVT KDKGNI VKTGGTTILT NEDGVTQEFKVG ENPPDI  
NKPIVPPPLPTPKLPTLPKLP SLPTLP LNFEP I EVKIPEFNPIEIDVAPGGENHFS TFS SSSFSHSSDINGE  
KTAGGGHKIYVNV DGEVQQE GSLYGVN

FC974337 (translated to AA), **CfSn1A** (*Choristoneura fumiferana*), partial sequence  
PGQGQVFHGVAAQSSSGMVQDKDGKQVVRAGGNSVLANDNGKVQELKQGEAPPDLNVP IRAPTMPKMPPELKFTHLP  
KIKMPMEPIKFEPITFKSFKPITFKPIVFEPIPPIDTEKLKTYQPKEGEQFFGSAVSSFSSETVNGKTAEEGGGS  
IIVNDNGKADEQHVVVFHEGDKDFAEE

FC967135 (translated to AA), **CfSn1B** (*Choristoneura fumiferana*), partial sequence  
AVGAHAKFVWQNDNEWPAFQQIRMPKMPKMPKPFKFEPIITFKPIVFEPIPPIDTEKLKTYQPKEGEQFFGSSVTSF  
SSSKTVNGKTVSEGGGSVIVNDNGKADEQHVVVFHEGDKDFAEE

MG649316, **CpSn1A** (*Cydia pomonella*)  
MASVRILIVA AVL VG CANAKFVWEPDTNDDFPAFKPFPKMPVPPTPPQLPFPFPFSPQNFAPFQPIRPIQPFAPN  
AFNFPMPHII SADEIKNAKPGPNGVYNGVMVSSSSNSYVDKDGKVVKKGGTSVLTNQDGKVQEWKQGNAPPDLNK  
PIQVGPLW

MG649317, **CpSn1B** (*Cydia pomonella*)  
MASVRILIVA AVL VG CANAKFVWEPDTNDDFPAFKPFPKMPKFEPIITFDPIEPIVFEPIEFEPKFDPIEPIKIDD  
IKNHKPGKGEKYSYGSVSAKSTKTVNGKVVEDKAASSVLTNDNGKVDQGHAGYNKGEKEPRRNK

MG649318, **CpSn1B2** (*Cydia pomonella*)  
MASVRILIVA AVL VG CANAKFVWEPDTNDDFPAFKPFPKMPKFEPIITFDPIEPIEFEPKFDPIEPIKIDDIKNHK  
PVKGEKYSYGSVSAKSTKTVNGKVVEDKAASSVLTNDNGKVDQGHAGYNKGEKEPRRNK

MG649319, **CpSn1C** (*Cydia pomonella*)  
MASVRILIVA AVL VG CANAKFVWEPDTNDDFPAFKPFPKMPVPPTPPQLPFPFPFSPQNFAPFQPIRPIQPYAP  
NAFNFPMPHII SADEIKNAKPGPNGVYNGVMVSSSSNSYVDKDGKVVKKGGTSVLTNQDGKVQEWKQGNAPPDLN  
KPIQMPKFEPIITFDPIEPIVFEPIEFDPKEPIKIDDIKNHKPGKGEKYSYGSVSAKSTKTVNGKVVEDKAASSV  
LTNDNGKVDQGHAGYNKGEKEPRRNK

MG649320, **CpSn3** (*Cydia pomonella*)  
MPKFTFVLVIVALAISVQGFPTFEDDVAAAASGDWAKVHEILRKNFASSFGQNTMTDVRNLKPQNGGHVFAEAK  
STFEHSSNINGKSSHERGGHEVVNNDGKVSEWDLN

OWR44300, **DpSn2** (*Danaus plexipus*)  
MKVLLISAILLQAWCNAYPKPKGVASYVYTDTDGNRYGGTYDLGNNIAPFSDPIISSFSDPYVPEFFNFGNII LP  
QIDLKNQRPALLNDPRAFNPYQRRGYNPSFSRFPFGGFPFGPSAFNVNRFGENAAFASSAIA PGYRHSQSAIISP  
ANADIPNVSLTDYADPSDDGKFYSVSSSSSFASSDNDNGKLSGFRQAETVVNDNGKITKYRVHS

OWR47400, **DpSn3** (*Danaus plexipus*)  
MYKLIIVFVVSAAVLAEGRPSLAKELVESAKSGNWDLFHELVRQQHALADWAFDFTSDVENLKPVDGANVSGHSI  
IVTKQWSDDGTNHSEHGEGREVINDNGQVTVRRFQI

MG604938, **GmSn1A** (*Galleria mellonella*)  
MATKILIFLSFVALSSAGFVWVDDDNNSFPKLRQLYVPPLPQPPPLPNIPGLPQPPPLPQPPPLFGFDFSPILPI  
PPIPPILPTPPFINIPAPEDIKNIKPKPGQFFNGISVKSRSGYALDKDGNRVKTTGGTAVLINDNGEVNETIV  
GDNPPKFEESRKESSEN

MG604939, **GmSn1B** (*Galleria mellonella*)  
MATKILIFLSFVALSSAGFVWVDDDNRFKLRQPIFPKIPKFEPTFKPFVFKPFVFEPIITFKPIDVNYQPKEG  
ENFVAVSTSSHHESSNVNGVEKSSGGSDIVTNVGGKINEEGVEFKKGRDDENNEERNTNENSGENNE

MG604940, **GmSn1B2** (*Galleria mellonella*)  
MATKILIFLSFVALSSAGFVWVDDDNRFKLRQIPKFEPTFKPFVFKPFVFEPIITFKPIDVNYQPKEGENFVA  
VSTSSHHESSNVNGVEKSSGGSDIVTNVGGKINEEGVEFKKGRDDENNEERNTNENSGENNE

MG604941, **GmSn1C** (*Galleria mellonella*)  
MATKILIFLSFVALSSAGFVWVDDDNRFKLRQLYVPPLPQPPPLPNIPGLPQPPPLPQPPPLFGFDFSPILPI  
PPIPPILPTPPFINIPAPEDIKNIKPKPGQFFNGISVKSRSGYALDKDGNRVKTTGGTAVLINDNGEVNETIV  
GDNPPKFEESRKESSEIFPKIPKFEPTFKPFVFKPFVFEPIITFKPIDVNYQPKEGENFVAVSTSSHHESSNVNG  
VEKSSGGSDIVTNVGGKINEEGVEFKKGRDDENNEERNTNENSGENNE

MG604944, **GmSn2A** (*Galleria mellonella*)  
MGSVLSGALLITRPGAPEGVGAYAYQDSAGNRSPFNFPFGFVIPSFPPTFGMSNFPNSAFAGGAAGPGFTHQIAS  
INPSNPDPNVDVMNRFADVSTPQGGNYVAMSSRAYSVSSNVNGKEYKDRGAETTVNNGKITTYRVKS

MG604943, **GmSn2B** (*Galleria mellonella*)  
MGSVLSGALLITRPGAPEGVGAYAYQDSAGNRAFHSNLENQRIALNAASKAFDLTSNQAGYIPSPFPHRSPFNFP  
FGFVIPSFPPTFGMSNFPNSAFAGGAAGPGFTHQIASINPSNPDPNVDVMNRFADVSTPQGGNYVAMSSRAYSVS  
SNVNGKEYKDRGAETTVNNGKITTYRVKS

MG604942, **GmSn2C** (*Galleria mellonella*)  
MGSVLSGALLITRPGAPEGVGAYAYQDSAGNRYGGTYGLNDGQFFGQKQHFPIPFQNNFNQNNFLDLDDFFPEY  
FRNFENLLQEAHFSNLENQRIALNAASKAFDLTSNQAGYIPSPFPHRSPFNFPFGFVIPSFPPTFGMSNFPNSAFA  
GGAAGPGFTHQIASINPSNPDPNVDVMNRFADVSTPQGGNYVAMSSRAYSVSSNVNGKEYKDRGAETTVNNGK  
ITTYRVKS

MG604945, **GmSn3** (*Galleria mellonella*)  
MSRLTVVFLATFLCVNIANANEFPPFFGGNFPPSFDFPKINIPKIKPINIDDIKLNKPSDGGVVNGAAVSSSST  
VENVNGVPRKQQTRIITNDNGQVKEVTYDN

GADK01000222 (translated to AA), **GmoSn1** (*Grapholita molesta*)  
MASATFLIVAVLVGCANGKFVWQSDNDDFPAFKMQMPVPPPTPKLPFAPFPPFQPFAPFQPFAPFQPVQPPFF  
FPPNAFKVPMRILTADIRNAKPGQNGVYNGIMVSSSSSSSYVDKDGKVVRRKGGTSVLSNQDGKVKWKEGNAPP  
DLNKPVQVRQPW

HMEL015978, **HmSn1** (*Heliconius melpomene*)  
MHDFSVYFQLLSLSEVELLLLLYQCQIMAYTILLFTAFIAASVNEEDMNLRMPPIPPVIVPTPEDIVKNKGNFNFI  
SVSSSSSSTVDKDGKVIQTGGTTVVTTNNDGVVKEFVFGDNPPNVISSASSFTQATNINGVKTSVGGGSLVSNVNG  
DVQENINYFGSNTV

AHX25884, **HaSn1** (*Helicoverpa armigera*)  
MAVTTVLIVASLVAIASAGFPFGFPWPENDDVFPPLPVPFFFEFDAPQPKPLNHNRRFKKFEFNFEPLNPERLKKIV  
PGENEYFKGKSVRSHSYSSNVNGVVNQEASVIRVENDNGKVNEETISFRKGP

XP\_021200362, **HaSn2A** (*Helicoverpa armigera*)  
MMKIIIFLVFIPLAWSYGPNTQGGGAFAYVDSTGNRYGGTYGLEDDGKVVRTSGDPIPEHFADTVDPYHGADFGPLF  
FGNFDHLLQEVFQKNFENQRLAFDAARQAFDLSSNQLGGYYPNPVNDYRYPFFGGFGMPMSGFGNSAFASASAGP  
GYQHVAIAISPSNPRMPNVDRVSHFADTSLPDGRKYYSVSSKSYSSSSNINGREISNRGAETLVNDNGKVTHYKV  
QN

XP\_021200363, **HaSn2B** (*Helicoverpa armigera*)  
MMKIIIFLVFIPLAWSYGPNTQGGGAFAYVDSTGNRYGGTYGLEDDGKVVRTSGDPIPEHFADTVDPYHGADFGPLF  
FGNFDHLLQEYPPFFGGFGMPMSGFGNSAFASASAGPGYQHVAIAISPSNPRMPNVDRVSHFADTSLPDGRKYYSV  
SSKSYSSSSNINGREISNRGAETLVNDNGKVTHYKVQN

XP\_021200479, **HaSn3** (*Helicoverpa armigera*)  
MAKFASTLILVVAIIISVQGGPVTYDEILAAARQQQFDKQVEFPQSETDSEDEMQLRSNFGKNTFVWKPFSNFSVRD  
LKPADGAHVYGEAEYSFHSASNIDGKTSEEHAGHKIINDDGKIEEFDFTPSSTQFPLLSPIITSLGGHSPISNDY  
GADYSFHHVVPVGVGEMSEYISGKKVDSKNKNIALSALKLPIITPISFTGVRDLKPEKGGQVYGEAQYAYRSATSVN  
GKTTEDEKGGHKIINNNGKVKEFDFTPSADQTNVSFF

GBTA01037100 (translated to AA), **HasSn3** (*Helicoverpa assulta*)  
MSKFASTLILVVAIIISVQGGPVTYDEILAAARQQQWQDKVQELLKSNFGKNTFVWKPFSNFSVRDLKPADGAHVYGE  
AEYSFHSASNIDGKTSEEHAGHKVINDDGKVEEFDFTPSSTQFPLLSPIITSLGGHSPISDYGGADYSFHHVVPV  
GVGDTSEYISGKKVDSKNQNTALSALKLPLTPLSFTGIRDLLKPEKGGQVYGEAQYAYRSATNVNGKTTEDKGGHK  
IINNNGKVKEFDFTPSADQTNVSFF

MG649321, **HcSn1A** (*Hepialus californicus*)  
MGGFSVIVFAACLLVSNVGVSSGFVFLPGFGFPHVNAFQQARDIQSFVHNQIRSMTPFAGGVVPPVGPVGHVFN  
GPNAGVVAAGAGGVVSTGTGGGTVVSTSTGGGTGGFVSTLGGGGHYGGGSTFVSSGGPKGGFVVIQTSSNI  
DGKQSGQVLINDNGKVTAYELPPGGGTVFTVQSNKGGPGVASSSYSSSSYSNGDGEKSSEGGVIDDN

MG649322, **HcSn1A2** (*Hepialus californicus*)  
MGGFSVIVFAACLLVSNVGVSSGFPHPVNAFQQARDIQSFVHNQIRSMTPFAGGVPVPGVGVHVFNGPNGAGVV  
SAAGAGGGVVSTGTGGGTVVSTSTGGGTGGFVSTLGGGGGHYGGGSTFVSSGGPKGGFVVIQTSSNIDGKQSGQV  
LINDNGKVTAYELPPGGGTVFTVQSNKGGPGVASSSYSSSYSSNGDGEKSSEGGVIDDN

MG649323, **HcSn2** (*Hepialus californicus*)  
MASASAFASSDSIRNRTPGFASQAASASGTGGIGRSNRAFMMNINNQRAALEASQRAFALAAQGGGGYQGPASFG  
YGYNPGYNPGYNPGYNAGFPQGGFQQAGNQQGAGNPQAAFASASIDPTGTRQIASISPSNSNSPNVDVHGPAPSR  
DGGGDGKIFYGVSSSSSFSSSNVNGVPTSQRTAHTVINDNGKITEHKVAS

MG652368, **MbSn1A** (*Mamestra brassicae*)  
MAFTTLLVTVSMVAIANAGWPHNDNPFPGFAGPMPFVFAYPKIPPHNPYQFGYSSFRHSIPFVDPKKIESYVPGP  
GETYKSSIRSSAFSTNYNGKVNQGGSLHMIDNDNGRVKQQHHTFGTTP

MG652369, **MbSn1A2** (*Mamestra brassicae*)  
MAFTTLLVTVSMVAIANGLNFGHFFLAGWPHNDNPFPGFAGPMPFVFAYPKIPPHNPYQFGYSSFRHSIPFVDPK  
KIESYVPGPGETYKSSIRSSAFSTNYNGKVNQGGSLHMIDNDNGRVKQQHHTFGTTP

MG652370, **MbSn1B** (*Mamestra brassicae*)  
MAFTTLLVTVSMVAIANAGWPHNDNPFPGFAGPMPFSLRFGLASQSSLPGMPNFGQNFPFFQLPAFPTMPAMTF  
PSLPSASDIANAKPKGGTFTGVVITSKTEAKRKDDGTIVKESGSTILMNDGVTVKKCMYLLAMFFWLTSNF

MG652371, **MbSn2A** (*Mamestra brassicae*)  
MMKILFVVMLSLAWSYGVNPNSEGGGAFVFDSSGNRYGGTYGLKDGKVVSRGTGDPFPQHFAENIPYPNFANNIPY  
QNFQDNIPYQNFADTVYPLEEDFGQAYFSNLENLLQEVFNKNLESQKLAFAAARKAFDLTSNQAGGYAGGYSGGY  
SGGYYPNPNIASRYPAFSPFPTFTMPRPMNFGNSAYASAAAGPGYQHHVASINPSNPANPNVDRTINHFSDT  
SAPRSGFYSVSSNSYSSSNVNGKELNNRGAETVVNDNGKVTHYKQVS

MG652372, **MbSn2B** (*Mamestra brassicae*)  
MMKILFVVMLSLAWSYGVNPNSEGGGAFVFDSSGNRYGGTYGLKDGKVVSRGTGDPFPQHFAENIPYPNFANNIPY  
QNFQDNIPYQNFADTVYPLEEDFGQAYFSNLENLLQEYPAFSPFPTFTMPRPMNFGNSAYASAAAGPGYQHHVAS  
INPSNPANPNVDRTINHFSDTAPRSGFYSVSSNSYSSSNVNGKELNNRGAETVVNDNGKVTHYKQVS

KOB72512, **ObSn3** (*Operophtera brumata*), partial sequence  
APQLPFEDI IAAANLGNWDKVVQSLSSKFGTAGWQPVLGNVRSCLKPVKGGHVYGESEYTFQSSSDQNGQKTEQS  
AGHKI INNDGDVKEFDKPKFEQNPFFKLS

GAQJ01002982 (translated to AA), **OfSn1A** (*Ostrinia furnacalis*)  
MPIMPRLPTLPIMPTPIPPKAPRFPFGGFQMPFIPLPKIPTAAEMASVKPGPNQVYNGVAVKSSSSSFTTRDKDGK  
LVRTGGTHILVNDNGEVQEEKFGTRPPNLNDPIVFPSPMEFKFSLPPLPMPMPMPMPMPMPAMPMPAMPKPIKPI  
IINPLDIEQHQPGENEHFVGVSTSSYSHSSNINGVEKSGGGAHYVVNVDGEVEKEVLHFGQGDKE

GAQJ01002988 (translated to AA), **OfSn1B** (*Ostrinia furnacalis*)  
MPEFKFSLPPLPMPMPMPMPMPAMPMPAMPKPIKPIIINPLDIEHQPGENEHFVGVSTSSYSHSSNINGVEK  
SGGGAHYVVNVDGEVEKEVLHFGQGDKE

MG674516, **OnSn1A** (*Ostrinia nubilalis*)  
MARTILIIIVSLVAAVHAGFVWTDNDNENNFSPFQHIRMPIPRPLPTLPIMPTPIPPKAPRFPFGGFQMPFIPLPK  
IPTAAEMASVKPGPNQVYNGVAVKSSSSSFTTRDKDGKLVRTGGTHILVNDNGEVQEEKFGTRPPNLNDPIVFP  
SVRFY

MG674517, **OnSn1A2** (*Ostrinia nubilalis*)  
MARTILIIIVSLVAAVHAGFVWTDNDNENNFSPFQHIRMPIPRFPFGGFQMPFIPLPKIPTAAEMASVKPGPNQVYNGV  
AVKSSSSSFTTRDKDGKLVRTGGTHILVNDNGEVQEEKFGTRPPNLNDPIVFP  
SVRFY

MG674518, **OnSn1B** (*Ostrinia nubilalis*)  
MARTILIIIVSLVAAVHAGFVWTDNDNENNFSPFQHIRMPEFKFSLPPLPMPMPMPMPMPMPAMPMPAMPKPIKPII  
INPLDIEQHQPGENEHFVGVSTSSYSHSSNINGVEKSGGGAHYVVNVDGEVEKEVLHFGQGDKE

MG674519, **OnSn1C** (*Ostrinia nubilalis*)



MARTILIIIVSLVAHVHAGFVWVTNDNENNFSPFQHIRMPIPRRLPTLPIMPTPIPPKAPRFFPGGFQMPFIPLPK  
IPTAAEMASVKPGPNQVYNGVAVKSSSSSFRDKDGLVVRTGGTHILVNDNGEVQEEKFGTRPPNLNDP IVFPSMP  
EFKFSLPPLPPMPMPMPMPMPAMPPIKPIIINPLDIELHQPGENEHFVGVSTSSYSHSSNINGVEKSGGGAHYV  
VNV DGEVEKEVLHFGQGDKE

MG674520, **OnSn2A** (*Ostrinia nubilalis*), partial sequence  
SLRTGDPAPAGVGAYAYQDSAGNRYGGTYGLDGAKEYSSKGP IGPNGRGTADPWGNFADAQAFSGGFGGGWPNF  
APYQQNFQQYDDFFPEYFNQLQTLLEAFSSNFENQKLAYNAARKAFDLTNSQAGYIPNFTSRLNMFNGGFPPF  
GMPMPGPNFAFAGASAGPGFTHQVAALNPENPSEPNVNVMSRFGEVPRGRGKYVSVSSSSSFSSSNVNGKEKT  
HKAETVYVNNNGKVTHYRVES

MG674521, **OnSn2B** (*Ostrinia nubilalis*), partial sequence  
SLRTGDPAPAGVGAYAYQDSAGNSRLNMFNGGFPPFGMPMPGPNFAFAGASAGPGFTHQVAALNPENPSEPNV  
NVMSRFGEVPRAGRKYVSVSSSSSFSSSNVNGKEKTHKAAETVYVNNNGKVTHYRVES

MG674522, **OnSn3** (*Ostrinia nubilalis*)  
MSKFALLAVLAVLAVAQGYPOKEVEISDAASNGDWNLVHKLIIQORFENQRNLWEP SLTIPTGNVRS LKPLEGGHV  
YGESEYTFRSESNVNGKKTESKGGHRVNVKDGVVTEYDIEPKF

MH127915, **Ossn2** (*Oligotricha striata*, *Trichoptera*), partial sequence  
LYIHARGGNNDGAASASASFGPGGGHQSANIYPENPSNPINNRFGSPGTPGGEYGVSTSSFSSSSNVNGKSS  
HKQASTSINDNGKVTTFVVRDSLFWPV

XP\_014366087, **PmSn1A** (*Papilio machaon*)  
MAYFFLIATIVLVGVNADPSNDNQNPFGQFPFDQFQKPFQNIHVNSFQPFPPFLHP IIPPFPTIKIPSPDDII  
GKKPSPGESFNGVVLVQSSSGFTTDENGNVIKNGGTTVLTDNNGEVKEFKVGTTPVVIKSNIVPPFQNPKITITKG  
KMPVMPMPLFFPQIHITSFNNDNLKRIKPGPNQHFVGSSSSSFTVSSNVNKRKNYAGATKTI VNNNGHVDEQAL  
IIENSV

XP\_014366086, **PmSn1B** (*Papilio machaon*)  
MAYFFLIATIVLVGVNADPSNDNQNPFGQFPFDQFQKPFQNIHVNSFQPFPPFLHP IIPPFPTIKIPSPDDII  
GKKPSPGESFNGVVLVQSSSGFTTDENGNVIKNGGTTVLTDNNGEVKEFKVGTTPVVIKSNIVPPFQNPKITITKG  
KTPPINLSKLPKIDLPKLPDINIPGIINIKGVQLPSIDFSQLPDIPSEMPVMPMPLFFPQIHITSFNNDNLKR  
IKPGPNQHFVGSSSSSFTVSSNVNKRKNYAGATKTI VNNNGHVDEQALIIENSV

KPJ09383, **PmSn2** (*Papilio machaon*)  
MAFLAIENQFNDHDTKRS GSPNDG VGVFAYQDSAGRRYECVYKPNVNEADDSSESSNVNKINEVLPYDTNWPCR  
RFLPPLPPLPPLKPLTPFKPLRPLPPLKPLRLLSPFPTLSPFPQLPPLPHFKLRDVI FGN IENQQRAAF EAAQ  
NTFGAFNNFPFI PNFD FRYPPYGHFNNGFSPYRAPFDMPSNSAFAAGAVGPGFRHQVAA INPGNPQMPNVDTTM  
NREPENRQGFYSVSSSSYASSLNNNGVQPQNRGAETVVDNNGRITKYVLGIPGCARQEDVVCRRRTAYCGRHWE  
RPTSTTEQTKDNDDDEVLTSNVMILKI

XP\_014366094, **PmSn3** (*Papilio machaon*)  
MMKLCPVIFVIGFLFINVEGAPFDANDISAAAANGDWDTFHRLIRNKFLLAHNRIEDKFRSMRRRLSQGFDFKPN  
FESIRSLQPDGPDSDNVYGEAQYSFHSSSNVNGQKSEQRGGRI INKNGVVEEYELP

XP\_013149659, **PpSn1** (*Papilio polytes*)  
MAYFTLIATIVLVGVNADSSDNDNPFPGFPFNQFQRPFHNVHNSFQPFPPFLHPV IIPPFPTIKIPSPDDII G  
KNPNPGETYSGIVVQSSSGYTTDENGNVKTGGTTVVTDNNGEVKEYKVGKNPPVIKNNIVPPVPVPPMPLFFP  
EIHISSFNNDNLKNIKPGPNQHFVGSSSSSFTVSSNVNKKNYAGASKTI VNNNGKVDEQALVIENSV

XP\_013149635, **PpSn2A** (*Papilio polytes*)  
MKVVYLVSIAIVLQCSWSYSGSPGPDG VGVFAYQDSTGRRYECVYKPNINEADDSSESSNVNKINEVLPFDTNWQCR  
RFLPPLPPLPPLKPLTPFKPLRPLPMPKPLRLLSPFPTLSPFPQLPPLPHFKTLRDTIFGN IENQQRAAF EAAQ  
NSFGAFNNFPFI PNFD FRYPPYGHFNNGFSPYRAPFDMSGSNSAFAAGAVGPGFRHQVAA INPGNPQMPNVDTTM  
NRAPENRQGFYSVSSSSYASSMNNNGVQPQNRGAETVVDNNGRITKYVVHN

XP\_013149637, **PpSn2B** (*Papilio polytes*)  
MKVVYLVSIAIVLQCSWSYSGSPGPDG VGVFAYQDSTGRRYECVYKPNINEADDSSESSNVNKINEVLPFDTNWQCR  
RFLPPLPPLPPLKPLTPFKPLRPLPMPKPLRLLSPFPTLSPFPQLPPLPHFKTLRYPPYGHFNNGFSPYRAPF

MSGSNSAFAAGAVGPGFRHQVAAINPGNPQMPNVDTTMNRAPENRQGFYVSVSSSSSYASSMNNNGVQPQNQRGAETV  
VNDNGRITKYVVHN

XP\_013149638, **PpSn2C** (*Papilio polytes*)

MKVVYLVSAIVLQCSWSYGSPPDGVGVFAYQDSTGRRYECVYKPNINEADDSSESSNVNKINEVLPFDTNWQDT  
IFGNIENQQRAAFEEAAQNSFGAFNNFPFIPNFDFRYPYPYGHFNYPGFSYRAPFDMSGSNSAFAAGAVGPGFRHQV  
AAINPGNPQMPNVDTTMNRAPENRQGFYVSVSSSSSYASSMNNNGVQPQNQRGAETVVNDNGRITKYVVHN

XP\_013149639, **PpSn2D** (*Papilio polytes*)

MKVVYLVSAIVLQCSWSYGSPPDGVGVFAYQDSTGRRYECVYKPNINEADDSSESSNVNKINEVLPFDTNWQYP  
PYGHFNYPGFSYRAPFDMSGSNSAFAAGAVGPGFRHQVAAINPGNPQMPNVDTTMNRAPENRQGFYVSVSSSSSYAS  
SMNNNGVQPQNQRGAETVVNDNGRITKYVVHN

NP\_001298377, **PpSn3** (*Papilio polytes*)

MKLCVPVIFIIIGFLFFSVEGAPFNQNEINAAAANGDWETFHRLLSQGFDFKPNFDSIRSLQPDGPD SKVYGEAQYS  
FHSSSNVNGQQSEQRGGRRIINKNGVVEEYELP

XP\_013177374, **PxSn1A** (*Papilio xuthus*)

MAHFFLIATIALLVGVNADPSNDNQNPFQGFQFNQFQRPQNFHVNQGFQPFPPFLHPIIPPFPPTIKIPSPDDII  
GKNPSPGETFSGVVVQSSSGYTTDENGNIKTGGTTVLTDNDGDVKEFKVGNPPVIKSNIVPPVVPVPTPVFF  
PQIHITSFNSDNLKNIKPGPNQHFVGSSSSSSFTVARNVNGKKNYAGATKTI VNNNGQVDEQALI IENS V

KPI97590, **PxSn1B** (*Papilio xuthus*)

MAHFFLIATIALLVGVNADPSNDNQNPFQGFQFNQFQRPQNFHVNQGFQPFPPFLHPIIPPFPPTIKIPSPDDII  
GKNPSPGETFSGVVVQSSSGYTTDENGNIKTGGTTVLTDNDGDVKEFKVGNPPVIKSNIVPPVVPVPTPVFF  
PQIHITSFNSDNLKNIKPGPNQHFVGSSSSSSFTVARNVNGKKNYAGATKTI VNNNGQVDEQALI IENS V  
PVFFPQIHITSFNSDNLKNIKPGPNQHFVGSSSSSSFTVARNVNGKKNYAGATKTI VNNNGQVDEQALI IENS DND  
NKEQEASDSSYMKQNMEAPASYIPLYGYVPFYELIGY

XP\_013177102, **PxSn2** (*Papilio xuthus*)

MKFLYLVSAVVLHCSWSYGSPPDGVGVFAYQDSTGRRYECVYEADDSSESSNVNKINEVLPFDTNWPCRRFLPP  
LPPLPPLKPLTPFKPLRPLPPMKPLPRLSPFPPTLSPFPQLPPLPHFKKFRDVIYDNIENQQRAAFEEAAQNTYGA  
FNNFPFIPNFDFRYPYPYGHFNYPGFSYRAPFDMSGSNSAFAAAAVGPGFRHQVAAINPGNPQMPNVDTTINRQPQ  
NRQGGQGFYVSVSSSSSYASSLNNNGVQPQNQRGAETVVNDNGRITKYAVHN

XP\_013177509, **PxSn3** (*Papilio xuthus*)

MMKLCVPLFVIGFIFINVEGAPFDQNDISAAAANGDWNTFHRLIQNKFRRLARNRIEDKFKLMRRRLSQGFDFKPN  
FDSIRSLQPDPSNVYGEAQYSFHSSSNVNGQKSEQRGGRRI VNKNGVVEEYELP

PIENAPT00000019993, **PnSn1A** (*Pieris napi*)

MALRCVVAFLAVTCTHALNQYQNEYGNFQNNHGFQFPQFSPITMPPIKPIVFPPTFPTFSPEDI INQRGGPGVNYN  
GVAISSSSFTNVGQDGKVQRGGGTKIITNRNGVIEEHTYPDDGSNINIVSSFPQPKIPKVPFLPLPPVPKIDPIV  
IPKYRPGPNEEFRGRSFVSYRHSSNINGERSGGGVDTI INNDNGRVDKKTYYGDLKDDF

PIENAPT00000019992, **PnSn1B** (*Pieris napi*)

MALRCVVAFLAVTCTHALNQYQNEYGNFQNNHGFQFPQFSPITMPPIKPIVFPPTFPTFSPEDI INQRGGPGVNYN  
GVAISSSSFTNVGQDGKVQRGGGTKIITNRNGVIEEHTYPDDGSNINIVLQFPQPKIPKFPVLPQIKLPLPLLPV  
PPFPQIKVPFLPLPPVPKIDPIVIPKYRPGPNEEFRGRSFVSYRHSSNINGERSGGGVDTI INNDNGRVDKKTYY  
YGDLKDDF

PIENAPT00000019991, **PnSn1C** (*Pieris napi*)

MPPIKPIVFPPTFPTFSPEDI INQRGGPGVNYNGVAISSSSFTNVGQDGKVQRGGGTKIITNRNGVIEEHTYPDDG  
SNINIVSSFPQPKIPKVPFLPLPPVPKIDPIVIPKYRPGPNEEFRGRSFVSYRHSSNINGERSGGGVDTI INNDN  
GRVDKKTYYGDLKDDF

PIENAPT00000008671, **PnSn2** (*Pieris napi*), partial sequence

YSVRITSGLPDRGVGVYAYQDSLGNRYGGSYGLDDKDIVRNSDPYFGQYPTVAQVPYLGNFADSFYPNYISNYD  
NILQEVFASNLEAQLASAAHKAYELTTNQIREFPNFSRFPSPGPIFGAGGLVPYDIMS RPN SAFASGAIGPGF  
SHQIAAINPENDAMRNI EVTNRFN DAPGNK F YGVSSSSSYSSSSNVNGKAQNL RGAETVVNNNGKITKYRVQDP

PIENAPT00000007293, **PnSn3** (*Pieris napi*)

MIKIFVLFAAMCALVTGNTLSVEDFIKAASAGDFKTLRKFVNPNFADFNFPGQPNLNTDVASLQPGPGAHVFGQA  
ESSFSSYSNNNGKVSSSESGGYGLINKDGVVSSYSFTPKNIVTPVENIPQN

maker-scaffold23-augustus-gene-1.98-mRNA-1, **PiSn1** (*Plodia interpunctella*)  
MHTTNHFQHLHKNKHAYAHSAAGYVWVDEEDDAPPGYKRMVVPIMQPPPLPGFGLPPLPQPPLYVVRDFSQPF  
HFHFPFQFVPIINIPSPADIKNTKSEPGKVFNGVSVKSVSGFGEDEDGKPIRTGGTTIVVNEGEVKETKVGKNPP  
NIED

maker-scaffold23-augustus-gene-1.96-mRNA-1, **PiSn2** (*Plodia interpunctella*)  
MSCRKRTPVGVSSFAYQDSSGNRYGGTYHTPDGQLDQFFEPKDLQFQTPYQONSQYQAGNFFPDYFRNLQFLIQD  
ITETREFSRSGERRSNLTPHLPLRAIKPFLKPLPPLRPLRLFRPRHAKSGSGAFESNLANQALALKAAQAFDLT  
SSQAGYIPYLPFRSGDFGNFGNMFNSANSAGAGGAGGPFTHQIAAISPPNPNPNVNVFERFNEGSAIPGANFV  
SMKSTAYSSSSNINGKEISNRGSETVVNNNGKVTGYSVHS

maker-scaffold23-exonerate\_est2genome-gene-1.26-mRNA-1, **PiSn3** (*Plodia  
interpunctella*)  
MTNFSVVVLAAFVLCALNANPTNFGSGGLDTSFDDAWEKLSISTPKPLTEQDIENLRPSNDTVVQGSHTYSKHV  
ETKNGVITNEESDTKDVTNDNGNVSKHETKN

BAS31058, **SrSn1A** (*Samia cynthia ricini*)  
MAFTKILLALSVALSNAFLLLWPNAGASSFAGSKNDYTGFPAPRFPLFPDFSGVLNFPPTSFVSSAFSGFPRFSPV  
FPSPDDIRNTKARPGQTYTGLFTSSGGGGGGVIANIDGQVLEKHFGETSSTTIDTLKMAFTKILLALLSVAL  
S

BAS31061, **SrSn1B** (*Samia cynthia ricini*)  
MAFTKILLALSVALSNAFLLLWPNAGASSFAGSKMFPSPFSGNLFPNPFILPPIINPDDIKTHVAGPNEHFSAVS  
TSSHSFSSNVGDGVTEGGGMSTIVNDGKNVKESVLVYGGDDGDRDGDHGDHNDTDNDD

BAS31060, **SrSn1C** (*Samia cynthia ricini*)  
MALMKIFLALLFVGLSNAVLMWPNDPRFPSSKNYYTRYAPAGYPTFPDSSDFMNFPFKVFVNDPFRFQSFPKVP  
FPSPDDIRNTNPRPGQTYTGLYASTGGSGGGVIANVDGQVLEKRFPETTSSTSN

GARL01003268 (translated to AA), **SeSn3A** (*Spodoptera exigua*)  
MAKIVSTLILLIVIIITVQQAPEYEEVIKAARAGNWEQVQKILNSNLGKQAGWMPSPFDSLRELKPENGGHVYGE  
AEYAYHSASNINGRTTEQSVGHKIINEDGRVKEFDFTPSTDYSPVIQSVISPIIQKAGDYGAAGYNQQYAGSGAG  
KPNIAGQRLNNNLQDDYYPNRSANLALPVPPLSFTNVRDLKPPQGGHVYGEAQYAYHTASNINGKKSSEDSGGHKI  
INNDGKIKEFDFTPKPKFGPLKPLAVLDKDIGELKSLFLQ

GARL01003267 (translated to AA), **SeSn3A2** (*Spodoptera exigua*)  
MAKIVSTLILLIVIIITVQQAPEYEEVIKAARAGNWEQVQKILNSNLGKQAGWMPSPFDSLRELKPENGGHVYGE  
AEYAYHSASNINGRTTEQSVGHKIINEDGRVKEFDFTPSTDYSPVIQSVISPIIQKAGDYGAAGYNQQYAGSGAG  
KPNIAGQRLNNNLQDDYYPNRSANLALPVPPLSFTNVRDLKPPQGGHVYGEAQYAYHTASNINGKKSSEDSGGHKI  
INNDGKIKEFDFTPKPKFGPVSYY

MG674523, **SliSn1A** (*Spodoptera littoralis*)  
MGLSTFMLTAFLVVMVMTSGFNYGHFFLAGWPGWPTGDNPFAGYHSPMKYNFPPYKFKPIRPFKMKSVFDSFENFHN  
FDDFPKFEIKPIDFDMIKTYQPGNGENFQGHSSIISSNSYSSNNNGEISQGGHIAVVQNNNGEVKEEKIVF

MG674524, **SliSn1A2** (*Spodoptera littoralis*)  
MGLSTFMLTAFLVVMVMTSGFNYGHFFLAGWPGWPTGDNPFAGYHSPMLSALRFGPISMPNPGFPKFPPTIPSPFTFLF  
PFPTMPTFQSIQDMVKTMPNKGSYSGVVVSTQTESKMKDDGTLVKKGGSTIVINDDGKVTVHTSKFLLLN

MG674526, **SliSn1A4** (*Spodoptera littoralis*)  
MGLSTFMLTAFLVVMVMTSAGWPGWPTGDNPFAGYHSPMLSALRFGPISMPNPGFPKFPPTIPSPFTFLFPPFTMPTFQ  
SIQDMVKTMPNKGSYSGVVVSTQTESKMKDDGTLVKKGGSTIVINDDGKVTVHTSKFLLLN

MG674528, **SliSn2A** (*Spodoptera littoralis*)  
MIKIIIFLVMPLAWSYGEPNLQGGGAFAYVDSSGHRYGGTYGLKDGRIPTSGDPIQRFADIAYPNEDDFGTAY  
FANLENLLQEVFQRNIENQRLAFDAARKAFDLTSNQAAGYPTPNLASRFAFTNIPSLPLPMPMPHFSGNSAFAGA  
AAGPGFQHQVASIFPVNPNPNVNHAFADTVQQPGRNGFYVSSNSFSSSSNVNGKTLNSRGAETLVNDNGRITHY  
KVEN



## Supplementary figure legends

**Figure S1. Alignments of amino acid sequences of the Sn1 seroins.** Line at the bottom of the figure indicates range of individual modules. Fuzzy borders of the modules are indicated by the broken line. Note that 18 top sequences represent the N-version, the bottom 17 sequences the C-versions, and the remainder are the L-versions of Sn1 seroins.

**Figure S2. Alignments of amino acid sequences of the Sn2 seroins.** Line at the bottom indicates range of individual modules. Fuzzy borders of the modules are indicated by the broken line. The sequences from B1 to C2 are highly diversified due to alternative splicing.

**Figure S3. Alignment of amino acid sequences of the Sn3 seroins.** The segments of the bottom line indicate the fuzzy borders of the modules. The large modules B2 and C2 were found in most noctuids but in no species from other superfamilies.

**Figure S4. Alignment of 117 seroin protein sequences used for the construction of phylogenetic trees** (shown in Figures 3 and S5).

**Figure S5. Phylogenetic trees based on 117 seroin protein sequences.** **(A)** Maximum likelihood tree reconstructed with NNI search algorithm, statistical evaluation calculated by aBayes test is shown next to the branches, only values higher than 50 are presented. **(B)** Maximum likelihood tree reconstructed with SPR search algorithm (from 10 random trees), statistical evaluation calculated by aBayes test is shown next to the branches, only values higher than 50 are presented. **(C)** Bayesian inference tree based on 3,000,000 generations (50% burn-in), nodes support values are Bayesian posterior probabilities, only values higher than 0.95 are shown.



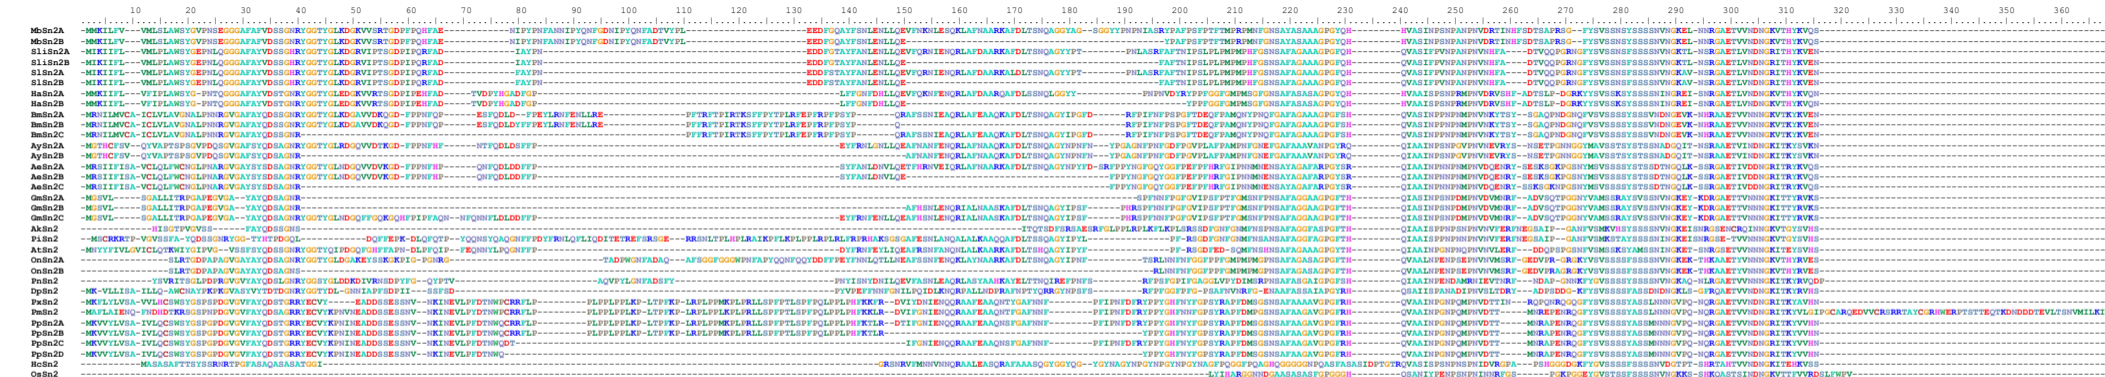

Fig. S2

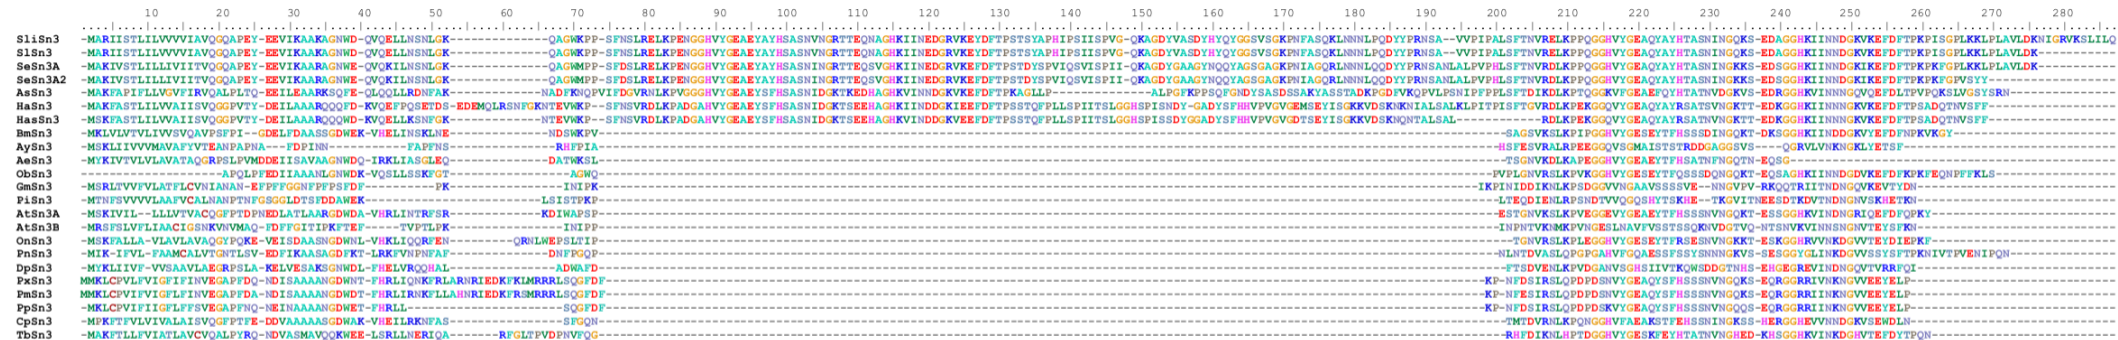

Fig. S3





Fig. S5A

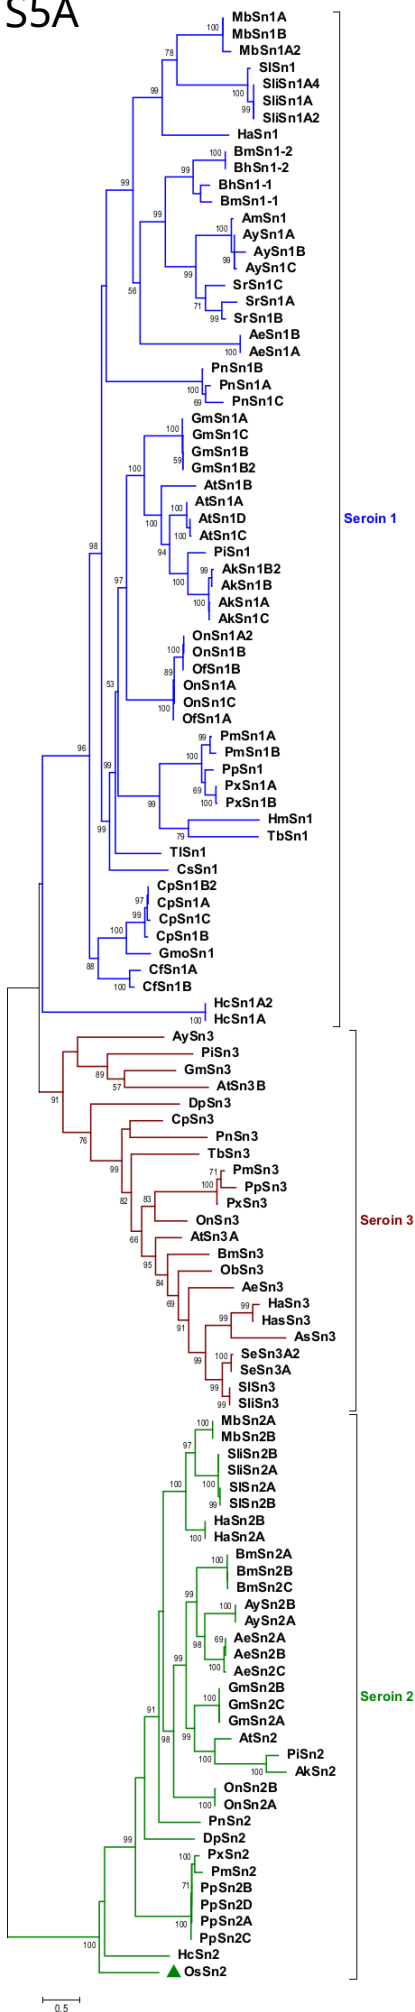

Fig. S5B

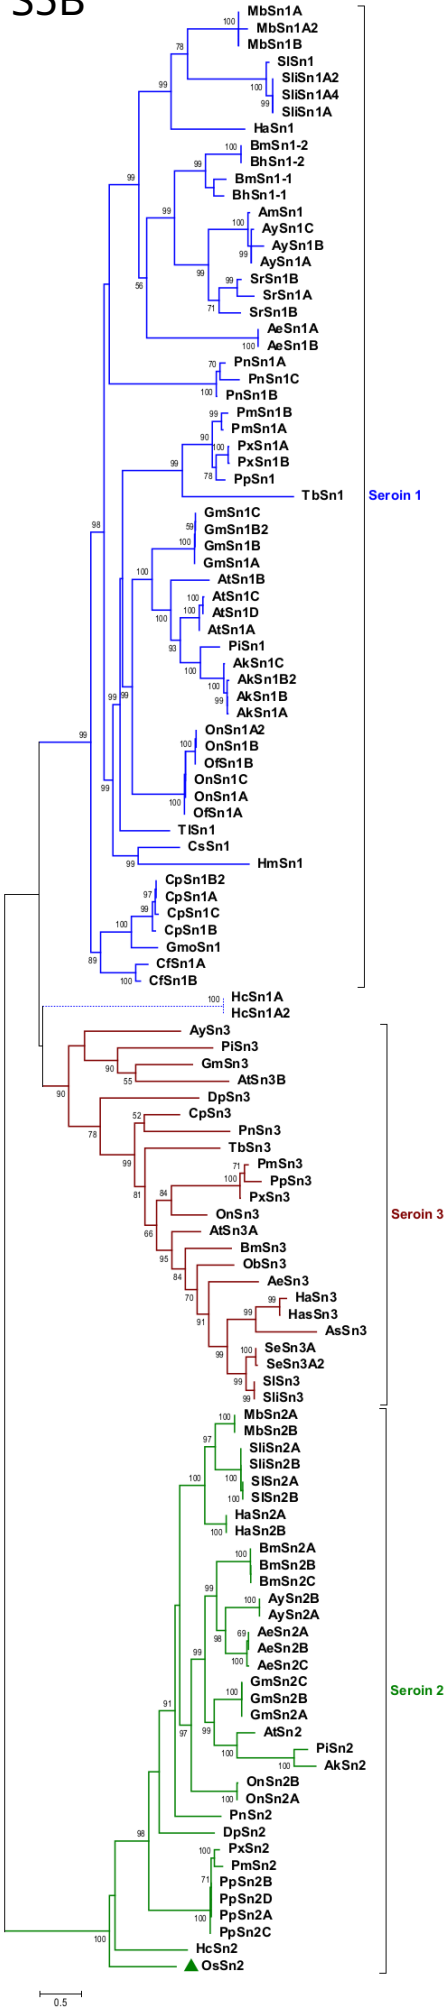

Fig. S5C

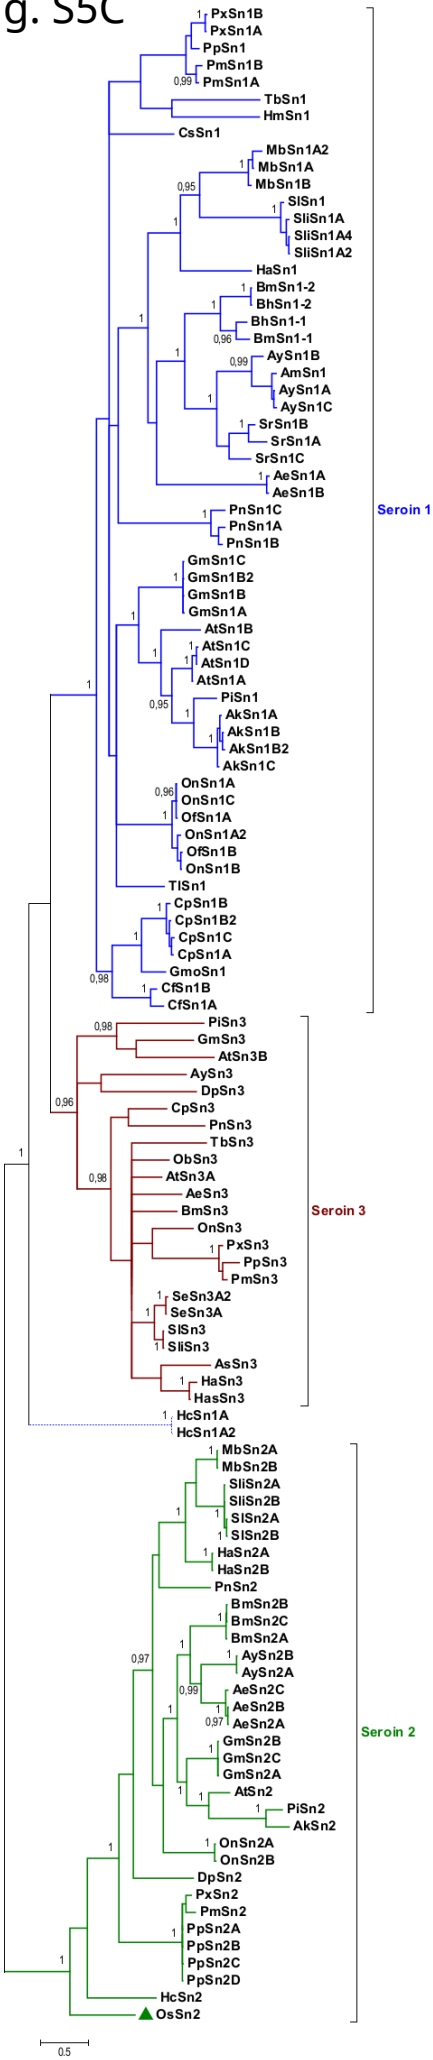

Supplement: 41598_2019_40401_MOESM1_ESM.pdf [file 41598_2019_40401_MOESM1_ESM.pdf]
